# Supplementary material for: COL1A1 is a prognostic biomarker and correlated with immune infiltrates in lung cancer
Source: PubMed Central journal article supplement (PMC8018245; doi:10.7717/peerj.11145), 2021-03-30

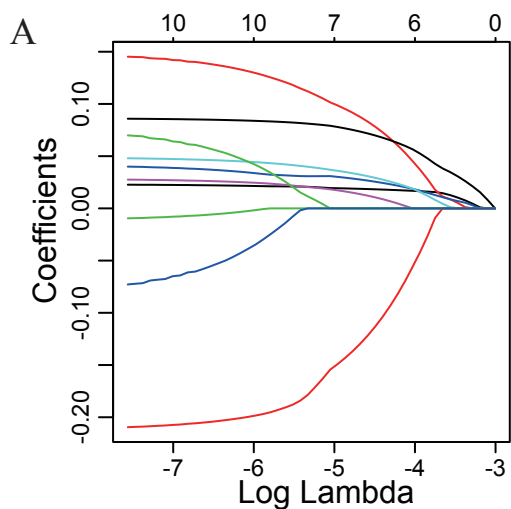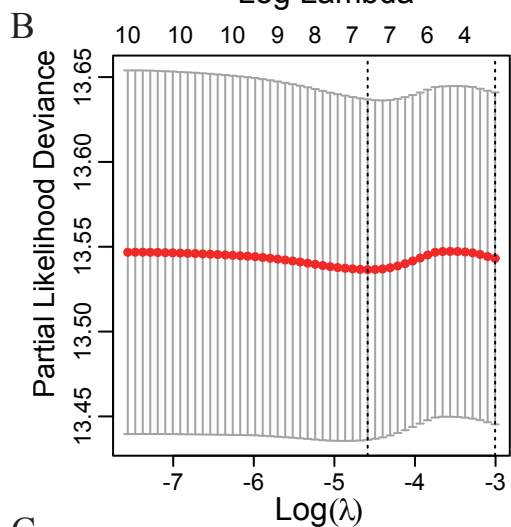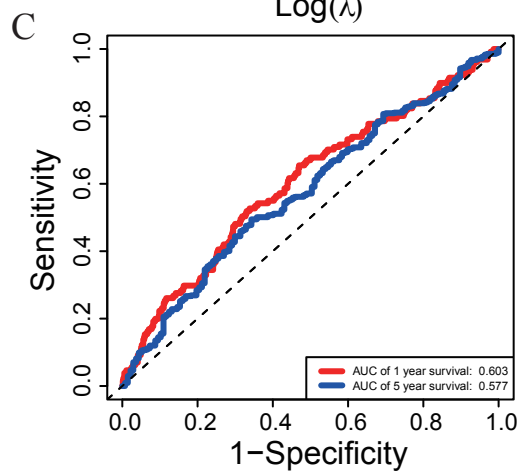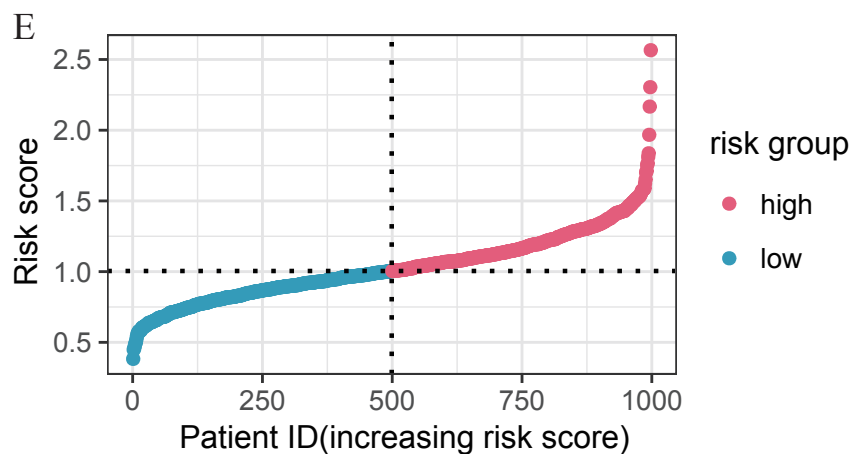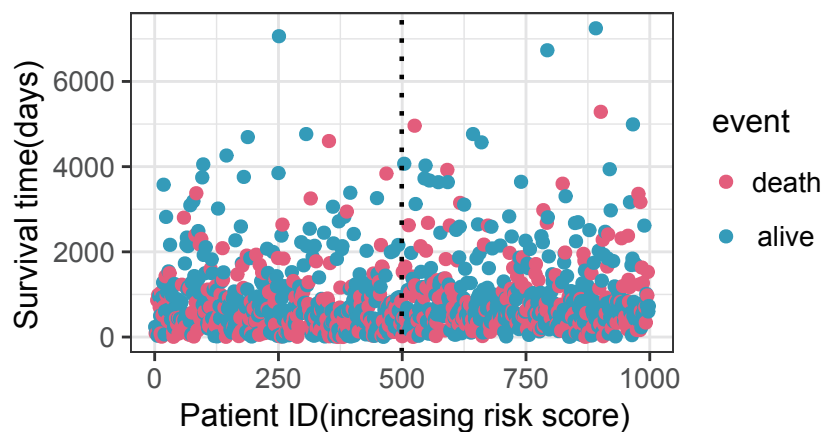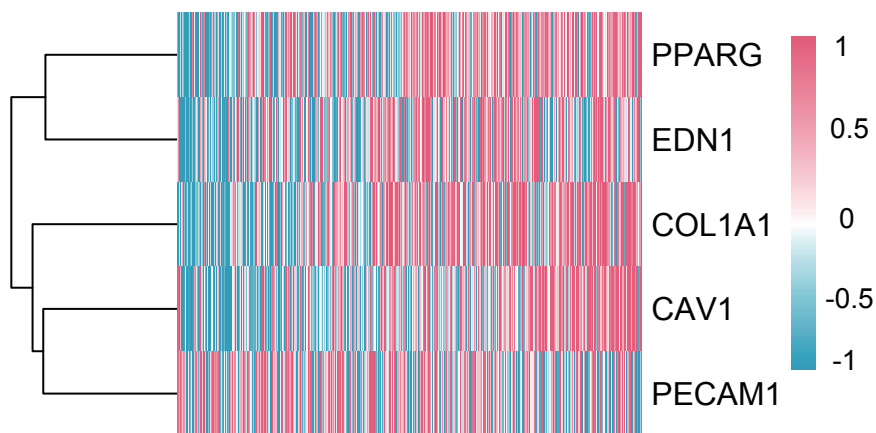

Supplement: peerj-09-11145-s002.pdf [file peerj-09-11145-s002.pdf]
